# Supplementary material for: Facile Synthesis of Gd-Functionalized Gold Nanoclusters as Potential MRI/CT Contrast Agents
Source: MDPI journal article supplement (doi:10.3390/nano6040065), 2016-04-09
Supplement: s1 [file s1]

# Supplementary Materials: Facile Synthesis of Gd-Functionalized Gold Nanoclusters as Potential MRI/CT Contrast Agents

Wenjun Le, Shaobin Cui, Xin Chen, Huanhuan Zhu, Bingdi Chen and Zheng Cui

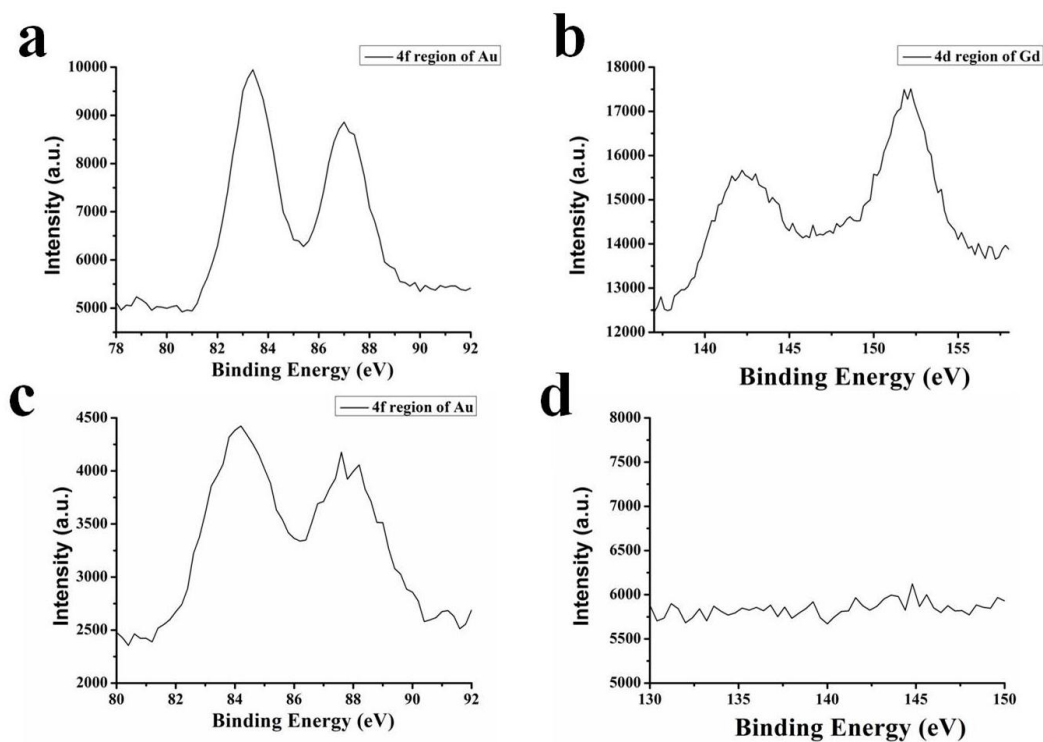

**Figure S1.** (a) X-ray photoelectron spectroscopy (XPS) spectra of Au 4f for Gd-Au nanoclusters (NCs); (b) the 4d region of Gd for Gd-Au NCs; (c) XPS spectra of Au 4f for Au NCs; (d) the binding energy region of Au NCs. (a.u.: Absorbance Unit).

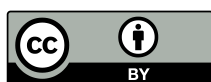

© 2016 by the authors; licensee MDPI, Basel, Switzerland. This article is an open access article distributed under the terms and conditions of the Creative Commons by Attribution (CC-BY) license (<http://creativecommons.org/licenses/by/4.0/>).
